# Supplementary material for: β2 Integrins on Dendritic Cells Modulate Cytokine Signaling and Inflammation-Associated Gene Expression, and Are Required for Induction of Autoimmune Encephalomyelitis
Source: MDPI journal article supplement (doi:10.3390/cells11142188), 2022-07-13
Supplement: s1 [file s1]

## Article

# β2 integrins on dendritic cells modulate cytokine signaling and inflammation-associated gene expression, and are required for induction of autoimmune encephalomyelitis

Monika Bednarczyk<sup>1</sup>, Vanessa Bolduan<sup>1</sup>, Maximilian Haist<sup>1</sup>, Henner Stege<sup>1</sup>, Christoph Hieber<sup>1</sup>, Lisa Johann<sup>2</sup>, Carsten Schelmbauer<sup>2</sup>, Michaela Blanfeld<sup>2</sup>, Simone Wörtge<sup>2</sup>, Khalad Karram<sup>2,3</sup>, Jenny Schunke<sup>1</sup>, Tanja Klaus<sup>1</sup>, Ingrid Tubbe<sup>1</sup>, Evelyn Montermann<sup>1</sup>, Nadine Röhrig<sup>1</sup>, Maike Hartmann<sup>1</sup>, Jana Schlosser<sup>1</sup>, Tobias Bopp<sup>3,4</sup>, Björn E. Clausen<sup>2,3</sup>, Ari Waisman<sup>2,3</sup>, Matthias Bros<sup>1,3</sup> and Stephan Grabbe<sup>1,3,\*</sup>

- 1 Department of Dermatology, University Medical Center of the Johannes Gutenberg-University Mainz, 55131 Mainz, Germany; m.bednarczyk.09@aberndeen.ac.uk (M.Be.), vbolduan@students.uni-mainz.de (V.B.), mhaist@uni-mainz.de (M.Ha.), Henner.Stege@unimedizin-mainz.de (H.S.), C.Hieber@imb-mainz.de (C.H.), jschunke@students.uni-mainz.de (J.S.), tklaus@students.uni-mainz.de (T.K.), tubbe@uni-mainz.de (I.T.), monterma@uni-mainz.de (E.M.), n.roehrig@uni-mainz.de (N.R.), Maike.Hartmann@unimedizin-mainz.de (M.Har.), schlosser.jana@stud.hs-fresenius.de (J.S.), mbros@uni-mainz.de (M.Br.), stephan.grabbe@unimedizin-mainz.de (S.G.)
- 2 Institute for Molecular Medicine, University Medical Center of the Johannes Gutenberg University of Mainz, Mainz, , Langenbeckstraße 1, 55131 Mainz, Germany; lijohann@students.uni-mainz.de (L.J.), cschelmb@uni-mainz.de (C.S.), blanfeld@uni-mainz.de (M.Bl.), karram@uni-mainz.de (K.K.), bclausen@uni-mainz.de (B.E.C.), waisman@uni-mainz.de (A.W.)
- 3 Research Center for Immunotherapy (FZI) University Medical Center of the Johannes Gutenberg University of Mainz, Mainz, , Langenbeckstraße 1, 55131 Mainz, Germany; karram@uni-mainz.de (K.K.), boppt@uni-mainz.de (T.B.), bclausen@uni-mainz.de (B.E.C.), waisman@uni-mainz.de (A.W.), mbros@uni-mainz.de (M.Br.), stephan.grabbe@unimedizin-mainz.de (S.G.)
- 4 Institute of Immunology, University Medical Center of the Johannes Gutenberg University Mainz, Langenbeckstraße 1, boppt@uni-mainz.de (T.B.)

\*Correspondence: stephan.grabbe@unimedizin-mainz.de; Tel.: +49 6131 17 4412

|            |                                                                        |          |     |                          |
|------------|------------------------------------------------------------------------|----------|-----|--------------------------|
| LOCUS      | B044.2                                                                 | 13010 bp | DNA | circular SYN 07-DEC-2012 |
| DEFINITION | B044.2 rotated to position 10485                                       |          |     |                          |
| ACCESSION  | B044.2                                                                 |          |     |                          |
| REFERENCE  | 1 (bases 1 to 13010)                                                   |          |     |                          |
| AUTHORS    | Self                                                                   |          |     |                          |
| JOURNAL    | Unpublished.                                                           |          |     |                          |
| COMMENT    | SECID/File created by Clone Manager, Scientific & Educational Software |          |     |                          |
| FEATURES   | Location/Qualifiers                                                    |          |     |                          |
| CDS        | 1..2451                                                                |          |     |                          |
|            | /gene="100% B6"                                                        |          |     |                          |

|               |                        |
|---------------|------------------------|
|               | /codon_start=3         |
|               | /SECDrawAs="Gene"      |
|               | /SECStyleId=1          |
| Misc._feature | 1..2451                |
|               | /gene="SA"             |
|               | /SECDrawAs="Region"    |
|               | /SECStyleId=1          |
|               | /label="Misc. feature" |
| CDS           | complement(1693..1727) |
|               | /gene="loxP"           |
|               | /SECDrawAs="Gene"      |
|               | /SECStyleId=1          |
| CDS           | 2106..2286             |
|               | /gene="Ex 3"           |
|               | /SECDrawAs="Gene"      |
|               | /SECStyleId=1          |
| CDS           | 2555..2602             |
|               | /gene="FRT"            |
|               | /SECDrawAs="Gene"      |
|               | /SECStyleId=1          |
| CDS           | complement(3097..3900) |
|               | /gene="neo"            |
|               | /SECDrawAs="Gene"      |
|               | /SECStyleId=1          |
| CDS           | 4473..4520             |
|               | /gene="FRT"            |
|               | /SECDrawAs="Gene"      |
|               | /SECStyleId=1          |

|               |                        |
|---------------|------------------------|
| Misc._feature | 4501..8671             |
|               | /gene="LA"             |
|               | /SECDrawAs="Region"    |
|               | /SECStyleId=1          |
|               | /label="Misc. feature" |
| CDS           | complement(4601..4635) |
|               | /gene="loxP"           |
|               | /SECDrawAs="Gene"      |
|               | /SECStyleId=1          |
| CDS           | 5424..5594             |
|               | /gene="Ex 4"           |
|               | /SECDrawAs="Gene"      |
|               | /SECStyleId=1          |
| CDS           | 6844..7085             |
|               | /gene="Ex 5"           |
|               | /SECDrawAs="Gene"      |
|               | /SECStyleId=1          |
| CDS           | 8244..8399             |
|               | /gene="Ex 6"           |
|               | /SECDrawAs="Gene"      |
|               | /SECStyleId=1          |
| Misc._feature | 8662..10456            |
|               | /gene="TK"             |
|               | /SECDrawAs="Region"    |
|               | /SECStyleId=1          |
|               | /label="Misc. feature" |
| CDS           | 8963..9892             |
|               | /gene="TK"             |

/SECDrawAs="Gene"

/SECStyleId=1

## ORIGIN

```

1  CCGGTGTCCC TCTGCTAGTG GTGTTTCCGG AGGTGCCACC TTCCAGATTT CTCCTCACTT
61  CCTATGTCAC CTTATAGTGA GTGACAGGCC ATCAGTGAGG CTCTATCAAG CTGGCTGTCT
121 CCACTAAACT ATATCTGTGC CCTTGCAGTC TGTCTACTGA AGACTCAGGC AGGATCCATT
181 ACCAATGTAG TGGTTATTAA ATGGCTCTCT GCCTCTCTCT CTCTCTGTCT CTCTCTGTCT
241 TTCTGTCTCT CTGTCTCTCG TGTGTGTGTG TGTGTGTGTG TGTGTGTGTG TGTGTGTCTC
301 CAGACTTCTA CCTCCATTGG TAAATCTGGA GATCTTAATT CTGGTCAGTA GTTTATAACC
361 ATTATTTTTC CAATCTGATG TTCAAGCTGT CCACATCTGG CCGCTGGACC CCTCTAAGCT
421 GTTCTGGTGT TCTGGGTGCT GTTCATATGA GCTTTCTTGT CATTTTATTT TGCCTCAAA
481 TTTTCTTAC TCTAGACTGA CTAGCTGTGC TGA CTGTACT CTGGCCTCCC CTCCCCTCGC
541 CCAAGAGTTA GAGTTAAAGA CCACTCCTAG TATTGTGTTT TATAAAACGA TAGGGAGAAA
601 AGAAGTGTGT TTGCTGGATG TACAGTCAGG TGTGGGAAGG GGGTGCCTCT GCAGGCCAG
661 GCTGAGGCAT CCCTTCCCC TGAGGGACCA GCCACACGAT GGTATAGTAT AGAATAAAGT
721 TTGTTTCAGG CATGGGGAGG GGGTTTAAGG GAGCAGAGGT GGATAAGGGC AGAGAGAGAG
781 AGGGAGAGAG AGAGAGAGAG GGAGAGAGAG AGAGAGAGAG AGAGAGAGAG AGAGAGAGAG
841 AGAGAGAATA TGAATAGTAG TAGAGGTCAG CTATGAGCAC ATGGAGCATG GGTTAAGGAG
901 CAGGAGCAAG GGCAAGAGAG AGGAAGGAGT AAGCAGCCTC CTTCTAGTGT AGTCAGGCAC
961 ACCTGGCTAT TGCCAGGTAA CTGTGGGGTG GAGCCTAGAC TAAATGCCAA CTTCTAGGCC
1021 TTCGCATTCT GTGCTACTTT TCTCATCTTC TCCATCCCAC AAGGCTTCTG GCTTCCATCT
1081 CCAGCAAACA CCCCCACCGT AGGCAGAGCT CCAGAGCAGA AAGGCCTGAT GTTGTAACCT
1141 CTATCCTGTG ACTGAGGGCT GTGGTCCAAG CCTTGACGA GCCATTCTCA GATGAGCTGG
1201 CGTTTCTCTC TTCTCTTGA GTCATTGTC TCATCTGAAA TGAACAGCCA GATGGCTAGT
1261 TCTGCATGGA TTACCAGTTA GCTTCTCTTC TCTCTGTTCT CTCTGGTTGC TTGTGTTTCT
1321 TGAGGACTTA ACACGGGGCT CTGAAGGCCA ATGCAGAACA GAGGGACTCT GGAGGTGATG
1381 TCTACTGCAT TTCTGGGTTG GTGTTCTTCT GGGTTTACTT TCTGTGAGCA AGCAGGCAAT
1441 CCCTGGTGCT TTCCAGTACC TTGCAGTTGA GCCAGACCTG CTTTGGATGC AATGGGTTC

```

1501 AGTTCAGGAC CAAGAACAAC CAAATACTTC CATGTCAGAT CCATGGGACC TTTGAAGGGA  
1561 GATGGTGGTC AAGATGGAGG TGCCCTGAGC TCTCCAGTCT CCTCACCAAC TCCATTCCCT  
1621 ATGAACCGAG AGAGACTTGA CCCCTAGATC TTCCCTGCAT CTCAGCAAGA GCTGTCACAT  
1681 AAGCCTAAAG AGATAACTTC GTATAATGTA TGCTATACGA AGTTATACGC GTCACCTTTG  
1741 GAGATGGCAT CTCCCCGGCA TCTCAACAGA CAAAGGCTCT GTTGAGAAAT GGTAAAGAG  
1801 TTCTTCTGGT CAACACTGAA ACTCAAGGAT GCTGATTAGC CTTTTGATTG GAGGTAGAGG  
1861 ACCCCATGTC TTTGCTGATG AAGTCAGTGC CCAAATGATA GAGAAAGGTC TATATAGTCT  
1921 ATGCTTTTGG TAACACAGAG CTCTCGGGGA GACCTAGACT CTCTGGGAGT CCGGTCTTCC  
1981 TTAGATGACT ACCGCATCCC ACAGAGATGT CTAAGTGAAC TTTCAAGGGC AGGTAAGAAG  
2041 GAAACAGGGC TGGATCCCAC TATTCTAGCC TATGCCCTCT GCCTGACCTC AGATCCCTCC  
2101 TCTAGAACTT CACTGGACCA GGAGAACCTG ACTCCTTGCG CTGTGACACA CGAGCACAGC  
2161 TGCTGCTGAA GGGTTGTCCA GCCGATGATA TCATGGACCC CAGGAGCATC GCTAATCCTG  
2221 AGTTCGACCA ACGGGGGCAA CGGAAACAGC TATCTCCACA AAAAGTGACA CTTTACTTGC  
2281 GACCAGGTAG GTATGGAACC TGGTTGGAAT GTGTGTGTGT GTGTGGCGGG GGGGGGGGGG  
2341 GGTGGAACAT CCCAGAGGGT AGGGAGAAGA ACCATGGCCA TTGACATGAA CCCGCATGGC  
2401 AATTACCAGC CACAAGTTGC TATGATTTCA TAAGGTTAGA AATATTGGGT TGTAATACGA  
2461 CTCCTAGTGT GGCAGATCTT CGAATGCATC GCGCGCACCG TACGTCTCGA GGAATTCCTG  
2521 CAGGATTTAA GGCCTTGACT AGAGGGTACC TCGAGAAGTT CCTATTCCGA AGTTCCTATT  
2581 CTCTAGAAAG TATAGGAACT TCGGATAATT CTAGAGTCAG CTTCTGATGG AATTAGAACT  
2641 TGGCAAAACA ATACTGAGAA TGAAGTGTAT GTGGAACAGA GGCTGCTGAT CTCGTTCTTC  
2701 AGGCTATGAA ACTGACACAT TTGGAAACCA CAGTACTTAG AACCACAAAG TGGGAATCAA  
2761 GAGAAAAACA ATGATCCCAC GAGAGATCTA TAGATCTATA GATCATGAGT GGGAGGAATG  
2821 AGCTGGCCCT TAATTTGGTT TTGCTTGTTT AAATTATGAT ATCCAACAT GAAACATTAT  
2881 CATAAAGCAA TAGTAAAGAG CCTTCAGTAA AGAGCAGGCA TTTATCTAAT CCCACCCAC  
2941 CCCACCCCC GTAGCTCCAA TCCTTCCATT CAAAATGTAG GTACTCTGTT CTCACCCTTC  
3001 TTAACAAAGT ATGACAGGAA AAACTTCCAT TTTAGTGGAC ATCTTTATTG TTTAATAGAT  
3061 CATCAATTTT TGCAGACTTA CAGCGGATCG ATCCCCTCAG AAGAACTCGT CAAGAAGGCG  
3121 ATAGAAGGCG ATGCGCTGCG AATCGGGAGC GGCGATACCG TAAAGCACGA GGAAGCGGTC

3181 AGCCCATTCG CCGCCAAGCT CTTCAAGCAAT ATCACGGGTA GCCAACGCTA TGTCTGATA  
3241 GCGGTCCGCC ACACCCAGCC GGCCACAGTC GATGAATCCA GAAAAGCGGC CATTTTCCAC  
3301 CATGATATTC GGCAAGCAGG CATCGCCATG GGTCACGACG AGATCATCGC CGTCGGGCAT  
3361 GCGCGCCTTG AGCCTGGCGA ACAGTTCGGC TGGCGCGAGC CCCTGATGCT CTTCTGTCAG  
3421 ATCATCCTGA TCGACAAGAC CGGCTTCCAT CCGAGTACGT GCTCGCTCGA TGCGATGTTT  
3481 CGCTTGGTGG TCGAATGGGC AGGTAGCCGG ATCAAGCGTA TGCAGCCGCC GCATTGCATC  
3541 AGCCATGATG GATACTTTCT CGGCAGGAGC AAGGTGAGAT GACAGGAGAT CCTGCCCCGG  
3601 CACTTCGCCC AATAGCAGCC AGTCCCTTCC CGCTTCAGTG ACAACGTCGA GCACAGCTGC  
3661 GCAAGGAACG CCCGTCGTGG CCAGCCACGA TAGCCGCGCT GCCTCGTCCT GCAGTTCATT  
3721 CAGGGCACCG GACAGGTCGG TCTTGACAAA AAGAACCAGG CGCCCCTGCG CTGACAGCCG  
3781 GAACACGGCG GCATCAGAGC AGCCGATTGT CTGTTGTGCC CAGTCATAGC CGAATAGCCT  
3841 CTCCACCCAA GCGGCCGGAG AACCTGCGTG CAATCCATCT TGTTCATGG CCGATCCCAT  
3901 ATTGGCTGCA GGTCGAAAGG CCCGGAGATG AGGAAGAGGA GAACAGCGCG GCAGACGTGC  
3961 GCTTTTGAAG CGTGCAGAAT GCCGGGCCTC CGGAGGACCT TCGGGCGCCC GCCCCGCCCC  
4021 TGAGCCCGCC CCTGAGCCCG CCCCCGGACC CACCCCTTCC CAGCCTCTGA GCCCAGAAAG  
4081 CGAAGGAGCA AAGCTGCTAT TGGCCGCTGC CCCAAAGGCC TACCCGCTTC CATTGCTCAG  
4141 CGGTGCTGTC CATCTGCACG AGACTAGTGA GACGTGCTAC TTCCATTTGT CACGTCTGTC  
4201 ACGACGCGAG CTGCGGGGCG GGGGGGAACT TCCTGACTAG GGGAGGAGTA GAAGGTGGCG  
4261 CGAAGGGGCC ACCAAAGAAC GGAGCCGGTT GGCGCCTACC GGTGGATGTG GAATGTGTGC  
4321 GAGGCCAGAG GCCACTTGTG TAGCGCCAAG TGCCCAGCGG GGCTGCTAAA GCGCATGCTC  
4381 CAGACTGCCT TGGGAAAAGC GCCTCCCCTA CCCGGTAGAA TTGACCTGCA GGGGCCCTCG  
4441 ATATCAAGCT CCTTGACTAG AGGGTACCTC GAGAAGTTCC TATTCGAAG TTCCTATTCT  
4501 CTAGAAAGTA TAGGAACTTC AGATCTGGCC TCGTGGGGCA GGTAGTGGGG AGAGCCTGAT  
4561 AGTTTTCTTT ACTGTGTGCA ATGTTTTCCC ACAGGACAAC ATAACCTTCGT ATAATGTATG  
4621 CTATACGAAG TTATAAGCTT TATCATTATC AACTGGCTCT GAAATTCCTT ATTGGCATCT  
4681 TGTAATTTGT TATTTTATTG ATACATAAAT CTAATTGGTT AACTTTAAGA TTAAGAGTCT  
4741 AATTTTGCTT GGCAGTGGTG GCACATGCCT TTAATCCCAG CACTTAGGAG GCAGAGGCAG  
4801 ATGGATTCTT GAGTTCAAGG CCAGCCTGGT CTACAGAGTG AGTTCCAGGA CAGCCTGGGC

4861 TATACAGAGA AACCTATTT CAAAAAGCCA AAAAAAAAAA AAAGTCTGAT TTTACCAGAG  
4921 TATTGGGTGT TGTGAGATGC AACTGCGAGG TTGGTGGTTC TATTTGGCCA CTGGAGTGTG  
4981 GGATCTCTGG TTACAGGGGA TTATAGCAGA AAGGGAAC TA GTGGTTCCTT GGACAAGCAA  
5041 GCCAGATGCT GCAGGTGGGG GGGGGGCAGG TAGCTGCAGA GAGTTGACAG GTTCATTTTT  
5101 TAATATTTCC ACAATAGATG GCACCCAATG TGGGGCACCT GACTATTTCT AGCACCATAA  
5161 TCTGGGTGTC TAGGCTTCCA ACTCATGAAT CTGCACCTTA CAGAAACCCT CCACCATCCA  
5221 GGCATTCTTG TACCTGGGGT GAGCCTACTT ATCTGAGTTC AAACCTACCC TTAAGAAGCT  
5281 TTACGTAAGT ACTTGTCTTG TGTCTGGTC ACAACCCCTT CCAGGTCATA GGAAATGGGG  
5341 GAGACAATAG GAATCTGGGG ACTGGGTGAG AGCCAAGACT CCAGCCAGGC TCAGAGTGTC  
5401 CCTTGCTTTT CTCTGACACG CAGGACAGGC TGCCGCATTC AATGTGACTT TCCGGCGGGC  
5461 CAAGGGATAC CCCATTGATC TGTACTACCT CATGGATCTC TCCTACTCCA TGCTTGATGA  
5521 CCTCAACAAC GTCAAGAAGC TGGGCGGGGA CTTGCTGCAG GCCCTCAACG AGATCACC GA  
5581 GTCTGGCCGC ATCGGTGAGA CCTGCAGTGC ACACACTCCT TTCAACCTTG GGAACCTCCT  
5641 GCCGCCCCAC ACCTCCATGT ACGGTGGATC CGCAGAGGCA GAAGCTGGGA GCTGCATAGG  
5701 CAATGTTTCGT GGGGCCAGAG TTCATCCTGA ATCCTTACCA GGGGCTGTCC TTGGTCACAG  
5761 GCTGCTAAGA CCTCTCTCTC TCTCTCTCTA GTTTATATTT TAATGTTTAA AAGGCAAAAG  
5821 TCCTACAATG CTAATTACTA AAAAGTATAT CTACCTTAAC ACAGCAACCA TGCATTAACA  
5881 GAATAGTGGA AGTAAACTAC AGGGCAGGGG TCACAGGGCT AGGGCCACTG GGCAAGGGTC  
5941 ACAGGGCAGG AGTCATAGGG TGAGAATTAC AACACTGACC AATACCACCA AGCATGTGGG  
6001 ACAAGGGAAC AGGGTACACC TACTCACTCC AGAACATCCC TCTGCCTCAT CGTCTATGTT  
6061 TAAGGATGCC CACATGAACA CGAACACTGG ATGCAAGCTC ATATATTCTT CTTTTTTTTT  
6121 TTTAAGACTT TTTAATTTCA TTTATATGAG TACACTGTAG CTGTCTTCAG ACACACCCGA  
6181 AGAGGGCATC AAATCCCATG ACAGATGGTT GTGAGCCACC ATGTGGTTGC TGGGAATTGA  
6241 ACTCAGAACC TCTGAAAGAG CAGTCAGTGC TCTTACCCGC TGAGCCATCT CTCCAGCCCC  
6301 CATATATTCT TGTGTGTTCA TACATTCACA TGTGTACATT CGTGTTCACA CATGTCCAAG  
6361 ATCCCATACA CAAGCACATT TGCACATGTG CAAGCAAGCA CATGTACAAA TGCCTAGTCA  
6421 TACCTGTGTG CCTGTATGCC TGCATACACA AGACCACATG TATATATACA GGTACTCGCA  
6481 TGCCCAACCA CACTCATGGT CACACCTGTC CATGACCCCA TACATATACA TGCTCTGTCA

6541 CATGCACACA CATGTTTGTA CATGGCCTCA CATATACTCA GCCGCACATG GCTACACACA  
6601 TGCTTGCACC ACACGCTCAG CTATCATGTT CACACAACCA TCATCTTGCT TTCTCCCTTG  
6661 TTTGAGAAAC TGAGGCTTGG TCCTTAGTCC ACTGGAAGGT TCACTGTCAT GCCTGGAGCC  
6721 CTGCCTGCTG CTTGTGCCCT GTGCCCTCCA GCCTCTGTTG TATATCCCTT GGACTCCAGG  
6781 TCTTCCCAGT CCTGGTGTCT GCTTCTGTCT GCTGTCCCCC TGCCTCATA C CATGTACCCT  
6841 TAGGCTTTGG GTCGTTTGTG GACAAGACGG TGCTGCCTTT TGTTAACACC CATCCTGAGA  
6901 AGCTGAGGAA CCCATGTCCC AACAAAGGAGA AGGCCTGCCA GCCCCATTT GCCTTTCGGC  
6961 ACGTGCTCAA GTTAACCGAC AACTCCAACC AGTTTCAGAC AGAGGTCGGC AAGCAACTGA  
7021 TTTCCGAAA CCTGGACGCC CCTGAGGGTG GGCTGGATGC CATAATGCAA GTTGCTGCAT  
7081 GTCCGGTGAG GCCATTGTCC CTGTTTCAGAT TTCCCAACTT CCTCAAATC AGGGCCTTCA  
7141 CCAGTGCCGT GGTGGTGGGT CTGTTTCAGAC ACTCACCCCA TCTGGTCCCA TGCTGTCACC  
7201 CCGGGTCTCA GAAGGGCAGC CTCCGTGGGC CACATCACTC CCAGGCATAG AGAAGGAAGA  
7261 GCCCTGAAAA CACCCACCCA TGCCCGTGCT AACTGACAGC CTTCATAGCT CTCCTGTGAG  
7321 CCAGGCTACC CAGCAGCAGG TCTTCTGGTT CCTAAAGCCT TTTCCCTCTC AGATCAAGAG  
7381 TGTGAGAACT GTTGTGGGAC AAAGGAACAG GGGCCCATGT CACCTCAATC ACATCCTGCC  
7441 TGTCGGCTCC AGATTGTGTT TATCAAGTGG TCACTGCAGC AAGCCAATCC CACCCAGCC  
7501 TGGCTCTCAG CTCTCTCACT TTGCTGGGTT CACGCAGTGG GCACACACAC TCTACATGTG  
7561 TGTTGGACTA GGGTAGGATA CATGGGTGCA GCAAGTGTAT GCTACTTCAA TGGTTCCAGG  
7621 CCCTCGGCTC TCCTGTGGAT GTCCCTTGGT CCCTTCTTTT GTGGCTGGGA GGTGTTTGCA  
7681 TTTTAACATA CAAGGCCATA CTCTTTTCCT TTCATGACTG TGTTGCTGGA ATCTAGTTTC  
7741 AGGTCTGAAG AGGTTTGCAA AGACATTTCT CTTTAGATTC AGATGTGTTT CTGTTCTTAC  
7801 CTCATACTGC TGCAGGGCAT GCTGGGAGTT GACGGCTTTG GCACTTCCTT GGCCTGGAT  
7861 TGGGGCTCTA TCTTCCTCTG TCTGTCTGTC TGTCTGTCTG TCTGTCTGTC TGTCTGTCTG  
7921 TCGTATCTGG GGGGTGTCTG TTTGTTTCCA TGTTTCTGTC TCTCTTTATA TATATATATC  
7981 TGTCTCTCTC TTTATCTCTA TCTGTTTTTA TGTCTTGTTG TCTCTGTCTC TATGTCTCTG  
8041 TGTCTCTATC ACTCTGTGTG TGTGTGTCTC TTTGTATGTA TGTCTCTGTC TGTGTGTCTG  
8101 TCTCTTTCTC TGTCTTTCTA TCTCTCTGTG TCTCTCTTTC TGTCTCTGTC TCTCTCACTC  
8161 TCCCTCACAC ACACACAACT CTTCTCCCCT GAGGGCCCCA GGGGGAAACC AAGGCAGGTA



8221 ACCCCTGGAT GCCTTCTTCC CAGGAGGAAA TTGGCTGGCG CAATGTCACG AGGCTGCTGG  
8281 TGTTTGCCAC AGACGATGGC TTCCACTTTG CTGGTGATGG CAAACTGGGT GCCATCCTGA  
8341 CCCCCAATGA TGGCCGCTGC CACCTGGAGG ATAACATGTA CAAGAGGAGC AATGAGTTCG  
8401 TGAGTGCTCT GCCTGCCTTG GCACGCCCCG GTACCAAGGC TGGTTACATA AACATAAAGG  
8461 TTACAGGAGT GACAACGGGA CAGGCTGAGA GCAGAGTCAC ATTGCCCAAT CACACAAACA  
8521 GAACCCAGAC TCCTCCTAAC ACGAATAACA AATCACAGAT GCAGTCCCAG AGACCCTGGT  
8581 GATAACATGA GACTCCCAGC ACCCACAATCA GCCTGCAGGG CAGTCCTCAC CCTGATCCTC  
8641 ATGGCAGAGG GCCTCACACA GCGCGCCTC GAGCAGTGTG GTTTTGCAAG AGGAAGCAAA  
8701 AAGCCTCTCC ACCCAGGCCT GGAATGTTTC CACCCAATGT CGAGCAAACC CCGCCCAGCG  
8761 TCTTGTCATT GGCGAATTCG AACACGCAGA TGCAGTCGGG GCGGCGCGGT CCGAGGTCCA  
8821 CTTGCGATAT TAAGGTGACG CGTGTGGCCT CGAACACCGA GCGACCCTGC AGCGACCCGC  
8881 TTAACAGCGT CAACAGCGTG CCGCAGATCT TGGTGGCGTG AACTCCCCG ACCTCTTCGG  
8941 CCAGCGCCTT GTAGAAGCGC GTATGGCTTC GTACCCCGGC CATCAACACG CGTCTGCGTT  
9001 CGACCAGGCT GCGCGTTCTC GCGGCCATAG CAACCGACGT ACGGCGTTGC GCCCTCGCCG  
9061 GCAGCAAGAA GCCACGGAAG TCCGCCCCGA GCAGAAAATG CCCACGCTAC TCGGGGTTTA  
9121 TATAGACGGT CCCCACGGGA TGGGGAAAAC CACCACCACG CAACTGCTGG TGGCCCTGGG  
9181 TTCGCGCGAC GATATCGTCT ACGTACCCGA GCCGATGACT TACTGGCGGG TGCTGGGGGC  
9241 TTCCGAGACA ATCGCGAACA TCTACACCAC ACAACACCGC CTCGACCAGG GTGAGATATC  
9301 GGCCGGGGAC GCGGCGGTGG TAATGACAAG CGCCCAGATA ACAATGGGCA TGCCTTATGC  
9361 CGTGACCGAC GCCGTTCTGG CTCCTCATAT CGGGGGGAG GCTGGGAGCT CACATGCCCC  
9421 GCCCCCGGCC CTCGCCCTCA TCTTCGACCG CCATCCCATC GCCGCCCTCC TGTGCTACCC  
9481 GGCCGCGCGG TACCTTATGG GCAGCATGAC CCCCAGGCC GTGCTGGCGT TCGTGGCCCT  
9541 CATCCCGCCG ACCTTGCCCG GCACCAACAT CGTGCTTGGG GCCCTTCCGG AGGACAGACA  
9601 CATCGACCGC CTGGCCAAAC GCCAGCGCCC CGGCGAGCGG CTGGACCTGG CTATGCTGGC  
9661 TGCGATTTCG CGCGTTTACG GGCTACTTGC CAATACGGTG CGGTATCTGC AGTGCGGCGG  
9721 GTCGTGGCGG GAGGACTGGG GACAGCTTTC GGGGACGGCC GTGCCGCCCC AGGGTGCCGA  
9781 GCCCCAGAGC AACGCGGGCC CACGACCCCA TATCGGGGAC ACGTTATTTA CCCTGTTTCG  
9841 GGCCCCGAG TTGCTGGCCC CCAACGGCGA CCTGTATAAC GTGTTTGCCT GAGCCTTGGA

9901 CGTCTTG GCC AAACGCCTCC GTTCCATGCA CGTCTTTATC CTGGATTACG ACCAATCGCC  
9961 CGCCGGCTGC CGGGACGCCC TGCTGCAACT TACCTCCGGG ATGGTCCAGA CCCACGTCAC  
10021 CACCCCCGGC TCCATACCGA CGATATGCGA CCTGGCGCGC ACGTTTGCCC GGGAGATGGG  
10081 GGAGGCTAAC TGAAACACGG AAGGAGACAA TACCGGAAGG AACCCGCGCT ATGACGGCAA  
10141 TAAAAAGACA GAATAAAACG CACGGGTGTT GGGTCGTTTG TTCATAAACG CGGGGTTCGG  
10201 TCCCAGGGCT GGCACCTCTGT CGATACCCCA CCGAGACCCC ATTGGGGCCA ATACGCCCGC  
10261 GTTCTTCCT TTTCCCCACC CCACCCCCCA AGTTCGGGTG AAGGCCAGG GCTCGCAGCC  
10321 AACGTCGGGG CGGCAGGCCC TGCCATAGCC ACTGGCCCCG TGGGTTAGGG ACGGGGTCCC  
10381 CCATGGGGAA TGGTTTATGG TTCGTGGGGG TTATTATTTT GGGCGTTGCG TGGGGTCAGG  
10441 TCCACGACCC AAGCTGGCGC GCCTACGTAA TCTTGAATCG AATTCCCGCA ACTACGTCAG  
10501 GTGGCACTTT TCGGGGAAAT GTGCGCGGAA CCCCTATTTG TTTATTTTTC TAAATACATT  
10561 CAAATATGTA TCCGCTCATG AGACAATAAC CCTGATAAAT GCTTCAATAA TATTGAAAAA  
10621 GGAAGAGTAT GAGTATTCAA CATTTCCGTG TCGCCCTTAT TCCCTTTTTT GCGGCATTTT  
10681 GCCTTCCTGT TTTTGCTCAC CCAGAAACGC TGGTGAAAGT AAAAGATGCT GAAGATCAGT  
10741 TGGGTGCACG AGTGGGTAC ATCGAACTGG ATCTCAACAG CGGTAAGATC CTTGAGAGTT  
10801 TTCGCCCCGA AGAACGTTCT CCAATGATGA GCACTTTTAA AGTCTGCTA TGTGGCGCGG  
10861 TATTATCCCG TGTTGACGCC GGGCAAGAGC AACTCGGTG CCGCATACAC TATTCTCAGA  
10921 ATGACTTGGT TGAGTACTCA CCAGTCACAG AAAAGCATCT TACGGATGGC ATGACAGTAA  
10981 GAGAATTATG CAGTGCTGCC ATAACCATGA GTGATAACAC TCGGCCAAC TTA CTCTGA  
11041 CAACGATCGG AGGACCGAAG GAGCTAACCG CTTTTTTGCA CAACATGGGG GATCATGTAA  
11101 CTCGCCTTGA TCGTTGGGAA CCGGAGCTGA ATGAAGCCAT ACCAAACGAC GAGCGTGACA  
11161 CCACGATGCC TG TAGCAATG GCAACAACGT TGCGCAA CT A TTA ACTGGC GAACTACTTA  
11221 CTCTAGCTTC CCGGCAACAA TTAATAGACT GGATGGAGGC GGATAAAGTT GCAGGACCAC  
11281 TTCTGCGCTC GGCCCTTCCG GCTGGCTGGT TTATTGCTGA TAAATCTGGA GCCGGTGAGC  
11341 GTGGGTCTCG CGGTATCATT GCAGCACTGG GGCCAGATGG TAAGCCCTCC CGTATCGTAG  
11401 TTATCTACAC GACGGGGAGT CAGGCAACTA TGGATGAACG AAATAGACAG ATCGCTGAGA  
11461 TAGGTGCCTC ACTGATTAAG CAT TGGTAAC TGTCAGACCA AGTTTACTCA TATATACTTT  
11521 AGATTGATTT ACCCCGGTTG ATAATCAGAA AAGCCCCAAA AACAGGAAGA TTGTATAAGC

```

11581 AAATATTTAA ATTGTAACG TTAATATTTT GTTAAATTC GCGTTAAATT TTTGTTAAAT
11641 CAGCTCATTT TTTAACCAAT AGGCCGAAAT CGGCAAAATC CCTTATAAAT CAAAAGAATA
11701 GCCCGAGATA GGGTTGAGTG TTGTTCCAGT TTGGAACAAG AGTCCACTAT TAAAGAACGT
11761 GGA CTCCAAC GTCAAAGGGC GAAAAACCGT CTATCAGGGC GATGGCCCAC TACGTGAACC
11821 ATCACCACAA TCAAGTTTTT TGGGGTCGAG GTGCCGTAAA GCACTAAATC GGAACCCTAA
11881 AGGGAGCCCC CGATTTAGAG CTTGACGGGG AAAGCGAACG TGGCGAGAAA GGAAGGGAAG
11941 AAAGCGAAAG GAGCGGGCGC TAGGGCGCTG GCAAGTGTAG CGGTCACGCT GCGCGTAACC
12001 ACCACACCCG CCGCGCTTAA TGCGCCGCTA CAGGGCGCGT AAAAGGATCT AGGTGAAGAT
12061 CCTTTTTGAT AATCTCATGA CAAAATCCC TTAACGTGAG TTTTCGTTCC ACTGAGCGTC
12121 AGACCCCGTA GAAAAGATCA AAGGATCTTC TTGAGATCCT TTTTTTCTGC GCGTAATCTG
12181 CTGCTTGCAA ACAAAAAAAC CACCGCTACC AGCGGTGGTT TGTTTGCCGG ATCAAGAGCT
12241 ACCAACTCTT TTTCCGAAGG TAACTGGCTT CAGCAGAGCG CAGATACCAA ATACTGTTCT
12301 TCTAGTGTAG CCGTAGTTAG GCCACCACTT CAAGAACTCT GTAGCACCGC CTACATACCT
12361 CGCTCTGCTA ATCCTGTTAC CAGTGGCTGC TGCCAGTGGC GATAAGTCGT GTCTTACCGG
12421 GTTGGA CTCA AGACGATAGT TACCGGATAA GGCGCAGCGG TCGGGCTGAA CGGGGGGTTC
12481 GTGCACACAG CCCAGCTTGG AGCGAACGAC CTACACCGAA CTGAGATACC TACAGCGTGA
12541 GCTATGAGAA AGCGCCACGC TTCCCGAAGG GAGAAAGGCG GACAGGTATC CGGTAAGCGG
12601 CAGGGTCGGA ACAGGAGAGC GCACGAGGGA GCTTCCAGGG GGAAACGCCT GGTATCTTTA
12661 TAGTCCTGTC GGGTTTCGCC ACCTCTGACT TGAGCGTCGA TTTTGTGAT GCTCGTCAGG
12721 GGGGCGGAGC CTATGGAAAA ACGCCAGCAA CGCGGCCTTT TTACGGTTCC TGGCCTTTTG
12781 CTGGCCTTTT GCTCACATGT AATGTGAGTT AGCTCACTCA TTAGGCACCC CAGGCTTTAC
12841 ACTTTATGCT TCCGGCTCGT ATGTTGTGTG GAATTGTGAG CGGATAACAA TTTCACACAG
12901 GAAACAGCTA TGACCATGAT TACGCCAAGC TACTCCAACG CGTTGGGAGC TCTCCCATAT
12961 GGTCGACCTG CAGGCGGCCG CGAATTCAC TGTGATTGAC CGTGACGTCA

```

**Figure S1.** Structure and sequence of CD18 gene locus exon 3 targeting vector B044.2. B044.2 consists of the pGEM-T Easy vector (Promega, Madison, WI). The CD18 gene locus encompassing insert was derived from the BAC clone RP23-95M21 (222.chori.org/bacpac). Part of intron 2 and total exon 3 were cloned into the AgeI site of pGEM-T Easy. The FRT-neomycin resistance-SV40-FRT cassette was cloned downstream of exon 3 (AgeI and HindIII/SnaBI restriction sites). Sequences comprising exons 4-6 were cloned into SnaBI site. The thymidine kinase expression cassette was cloned into the AscI site at the 3' end of exon 6. The 5' loxP site is located upstream of exon 3 and the 3' loxP site adjacent to the FRT-neomycin resistance-SV40-FRT cassette upstream of exon 4.

**Table S1.** Antibodies used for flow cytometric analysis

| Antibody specificity | Clone           | Fluorescence label                   |
|----------------------|-----------------|--------------------------------------|
| CD3                  | 145-2C11, 500A2 | eFl506, PE-Cy5, APC                  |
| CD4                  | GK1.5, RM4-5    | eFl450, FITC, AF700, APC-Cy7         |
| CD8                  | 07.06.53        | eFl450, FITC, BV510, PE-Cy5, APC-Cy7 |
| CD11a                | M17/4           | PE-Cy7                               |
| CD11b                | M1/70           | PE, PE-Cy5, PE-Cy7                   |
| CD11c                | N418            | APC, PE-Cy7                          |
| CD18                 | M18/2           | FITC, APC                            |
| CD19                 | 1D3             | PE-Cy5, SB702, APC, APC-Cy7          |
| CD25                 | 7D4             | FITC                                 |
| CD40                 | 1C10            | APC                                  |
| CD45                 | 30-F11, A20     | FITC, SB702                          |
| CD62L                | MEL-14          | APC                                  |
| CD68                 | FA-11           | FITC, PE                             |
| CD69                 | H1.2F3          | PE                                   |
| CD80                 | 16-10A1         | PE                                   |
| CD86                 | GL1             | FITC                                 |
| CD103                | 2,00E+007       | PE                                   |
| CD172a               | P84             | PE-Cy7                               |
| CD207                | eBioL31         | PE                                   |
| CD317                | 9,27E+002       | BV711                                |
| F4/80                | BM8, T45-2342   | e-Flour450, BB790                    |
| Foxp3                | FjK-16a         | FITC                                 |
| GATA-3               | TWAJ            | PE                                   |
| GR-1                 | RB6-8C5         | APC                                  |
| Ly6-C                | AL-21, HK1.4    | FITC, BV570, APC                     |
| Ly6-G                | 1A8             | e-Flour450                           |
| MHCII                | M5/114.15.2     | eFl450, PE-Cy5                       |
| NK1.1                | PK136           | PE-Cy5, APC                          |
| phospho-STAT1        | A15158B         | PE                                   |
| phospho-STAT3        | 13A3-1          | AF488                                |
| phospho-STAT5        | 12-9010-42      | PE                                   |
| ROR- $\gamma$ t      | AFKJS-9         | APC                                  |
| T-bet                | eBio4B1         | PerCP-Cy5.5                          |
| XCR1                 | ZET             | BV650                                |

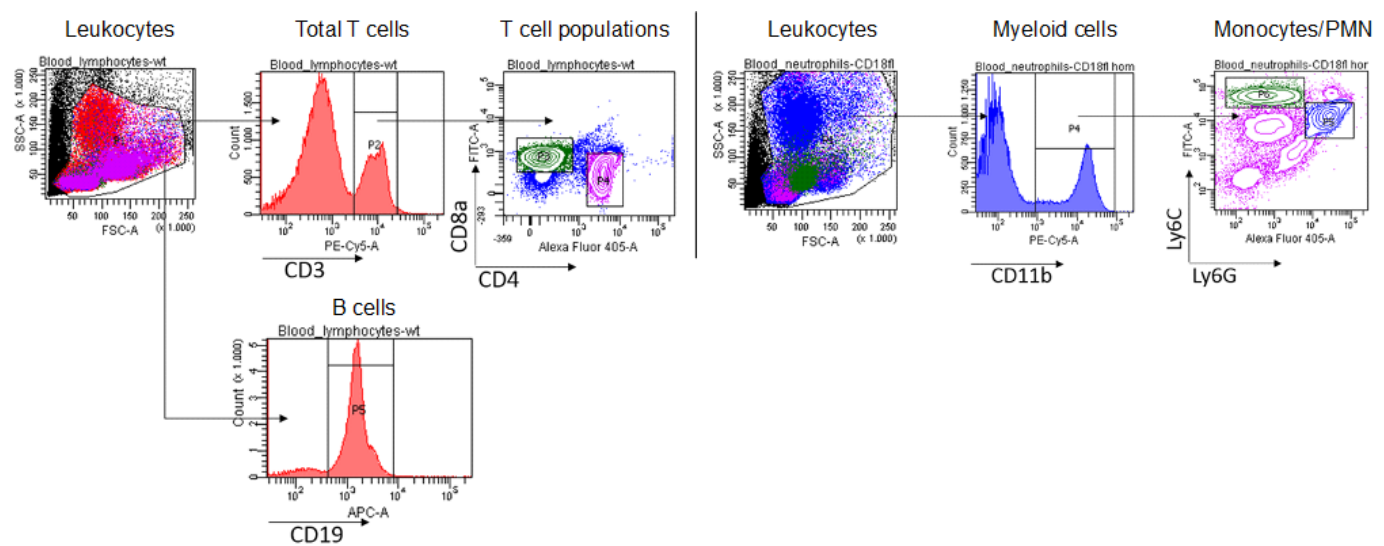

**Figure S2.** Gating strategy of leukocyte populations in blood (Attune NxT flow cytometer).

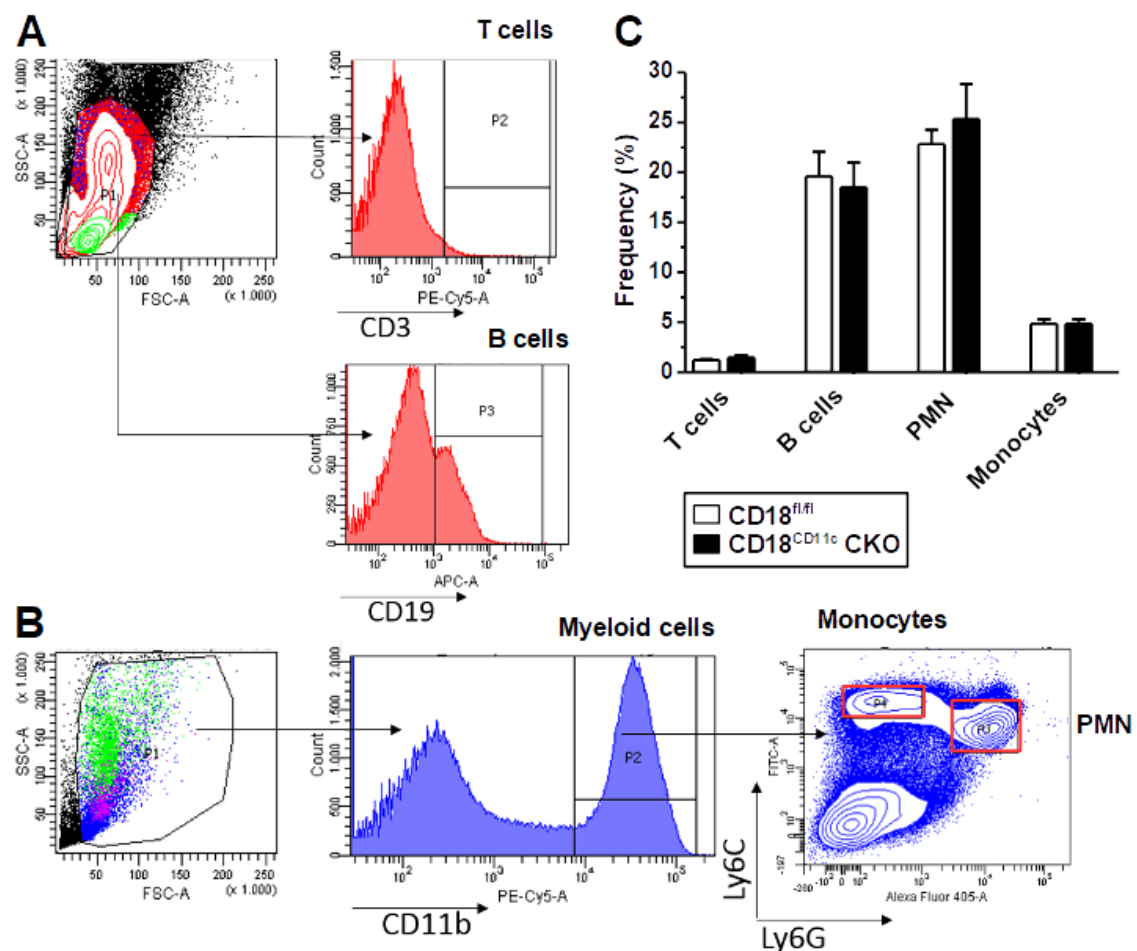

**Figure S3.** Frequencies of leukocyte populations in bone marrow are unaltered in CD18<sup>CD11c</sup> cKO mice. (A, B) Gating strategies of (A) B cells and T cells as well as of (B) polymorphonuclear granulocytes [PMN] and monocytes as assessed by flow cytometry are shown. (C) Frequencies of either cell type in bone marrow are shown (mean±SEM of 4 experiments).

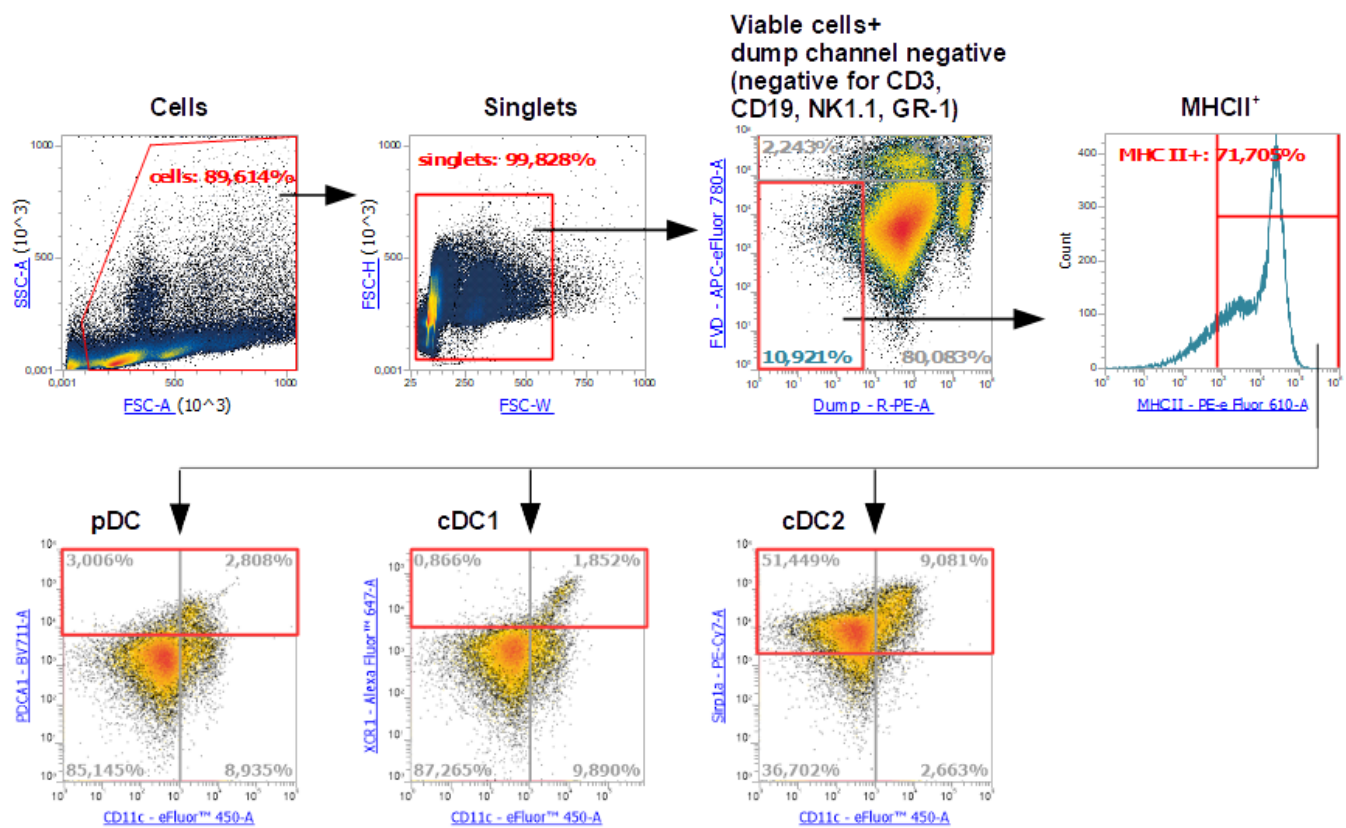

Figure S4. Gating strategy for splenic DC populations (Attune NxT flow cytometer).

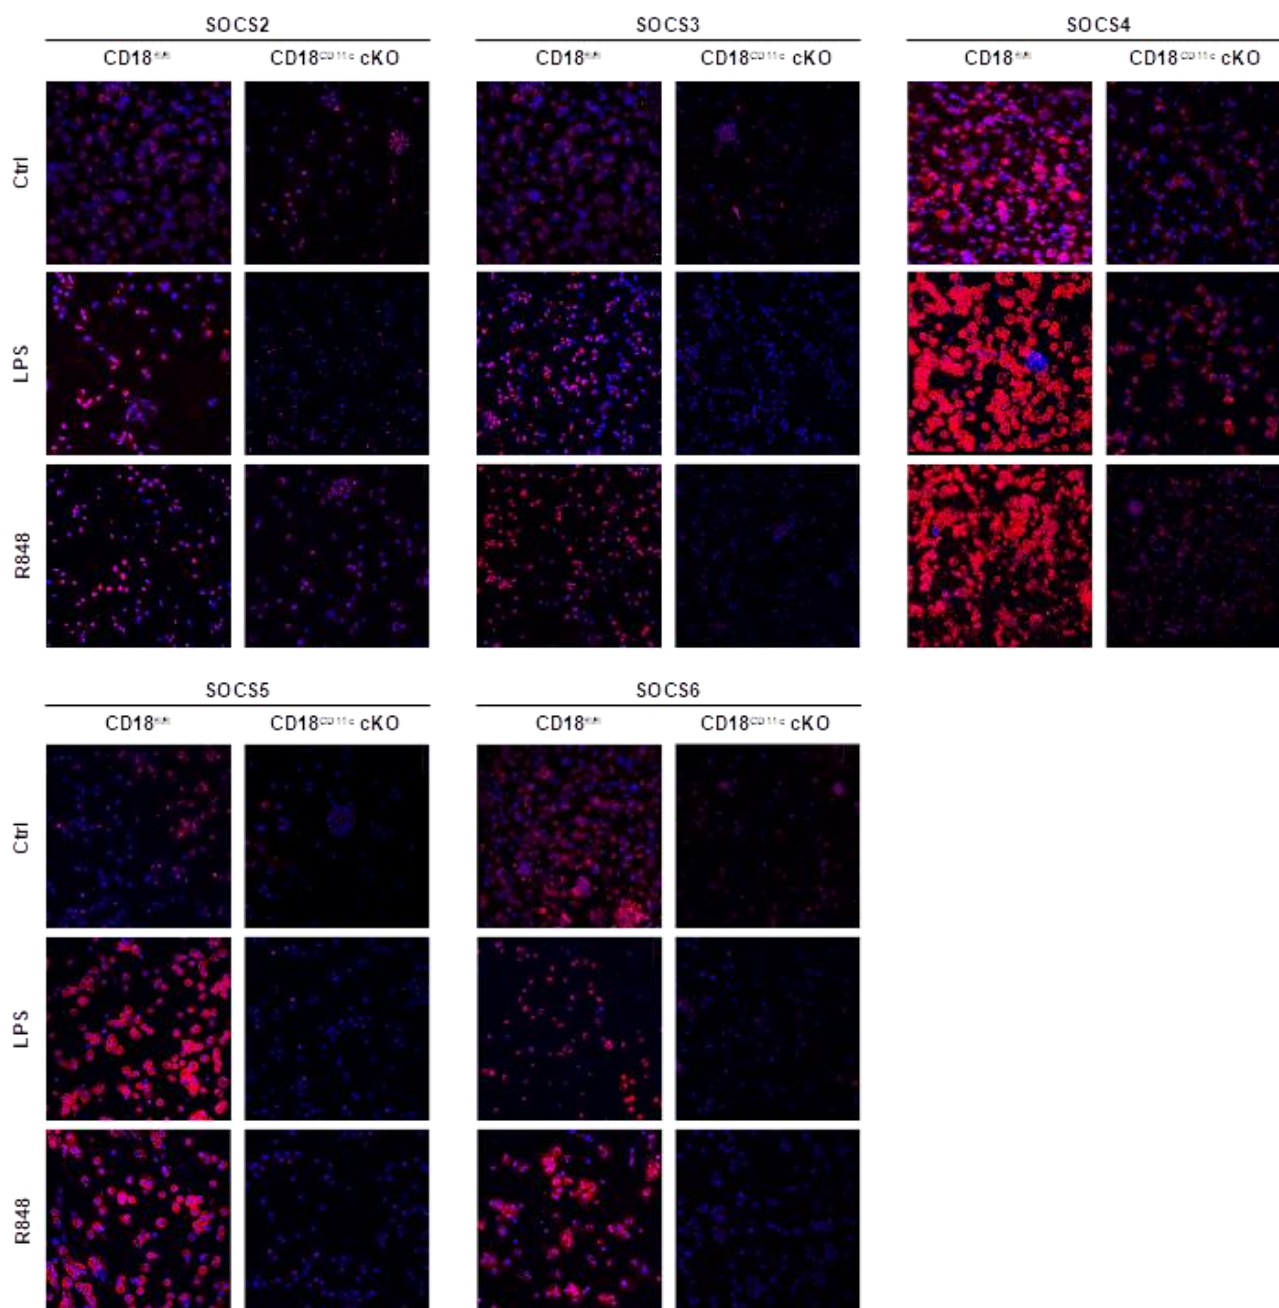

**Figure S5.** BMDC lacking  $\beta 2$  integrins display disturbed regulation of SOCS protein expression. BMDC (CD18<sup>fl/fl</sup>, CD18<sup>CD11c cKO</sup>) were stimulated overnight in parallel with LPS and R848 or were left untreated (Ctrl). On the next day, SOCS protein expression was assessed on cytopins by immunofluorescence (AF647; red) and nuclei were stained with Hoechst dye (blue) (experimental details given in 2.10.). Pictures are representative of 3–4 experiments each.



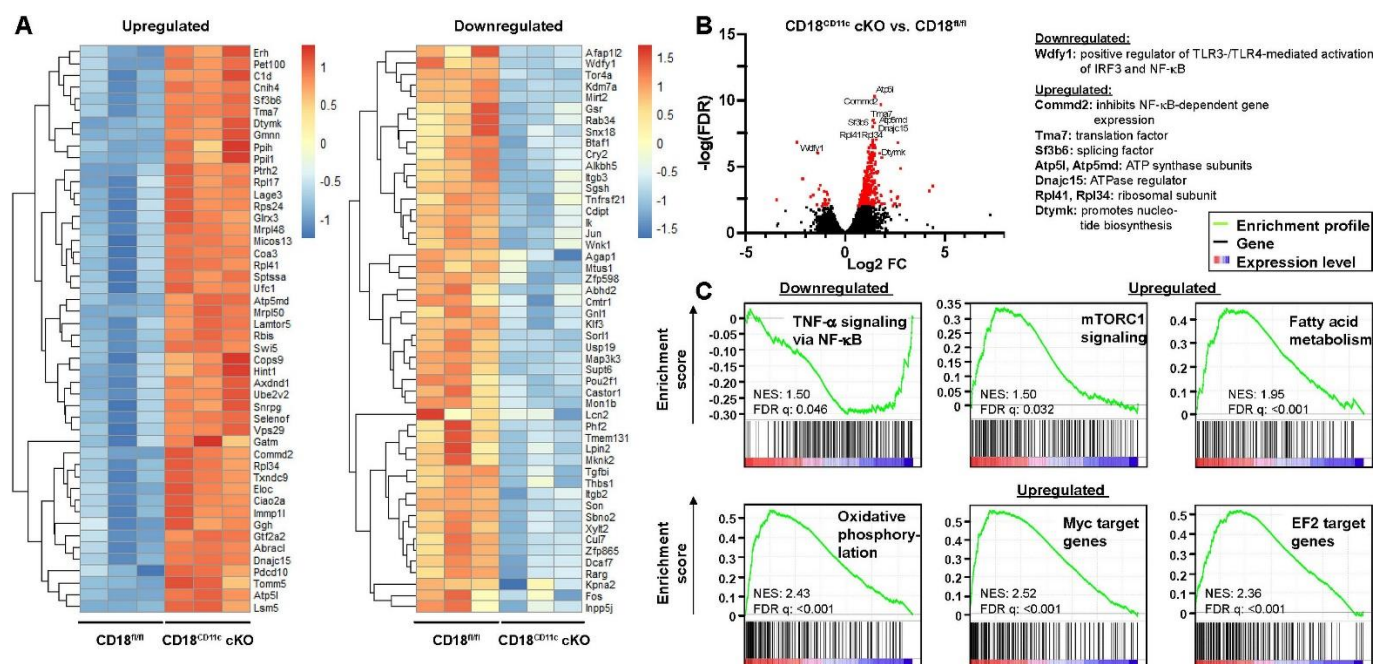

**Figure S6.** Downregulation of  $\beta 2$  integrins in BMDC results in attenuated expression of genes associated with inflammatory signaling and upregulation of genes involved in metabolic pathways, and transcription factor Myc/EF2 targets. Unstimulated BMDC (CD18<sup>fl/fl</sup>, CD18<sup>CD11c</sup> cKO, each n=3) were subjected to RNA-seq analysis. (A) Heatmap representation of the Top 50 genes significantly upregulated (left panel) and downregulated (right panel) in CD18<sup>CD11c</sup> cKO versus CD18<sup>fl/fl</sup> BMDC clustered by hierarchical clustering. The color legend denotes the level of gene expression (low: blue, high: red) and represents z-scores. (B) Left panel: Volcano plot of all quantified mRNA species. Significantly regulated genes (t-test q-value < 0.05 and log<sub>2</sub>[fold-change] > 2) are given in red. Top 10 genes are named. Right panel: Functional role of Top 10 genes. (C) Gene set enrichment plots of significantly regulated pathways (FDR adjusted q-values < 0.05). The normalized enrichment score (NES) and FDR q-values are given.

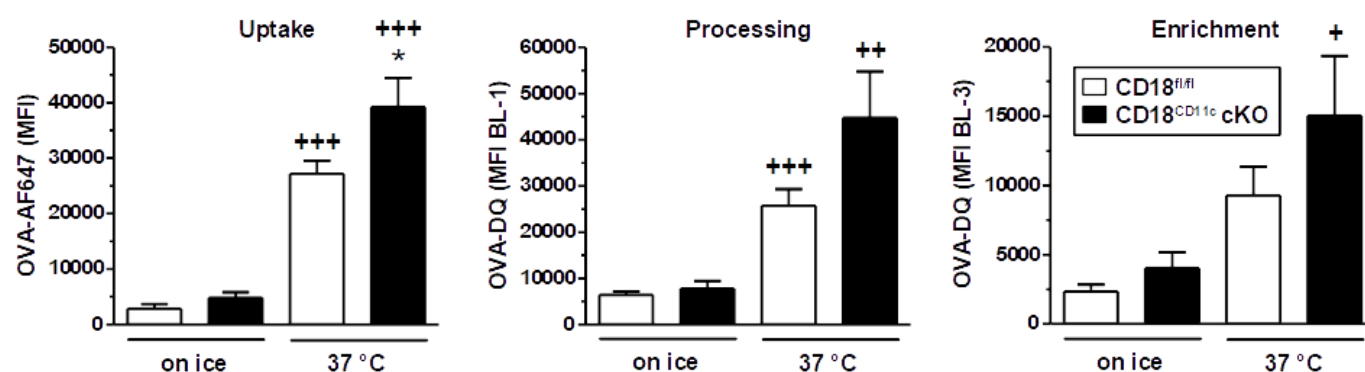

**Figure S7.**  $\beta 2$  integrin-deficient BMDC display higher antigen uptake and processing capacity. BMDC were kept on ice or at 37 °C, and OVA derivatives (OVA-AF647, OVA-DQ; each 25  $\mu$ g/ml) were applied for 1h. OVA uptake (left panel), processing (middle panel) and endo-/lysosomal enrichment of processed OVA in MHCII-expressing cells were assessed by flow cytometry. Data denote the MFI (mean  $\pm$  SEM of 6-9 experiments). Statistical differences versus \*CD18<sup>fl/fl</sup> and +versus according control group (on ice) are indicated (one way ANOVA, Tukey test). \*p<0.05, ++p<0.01, +++p<0.001.



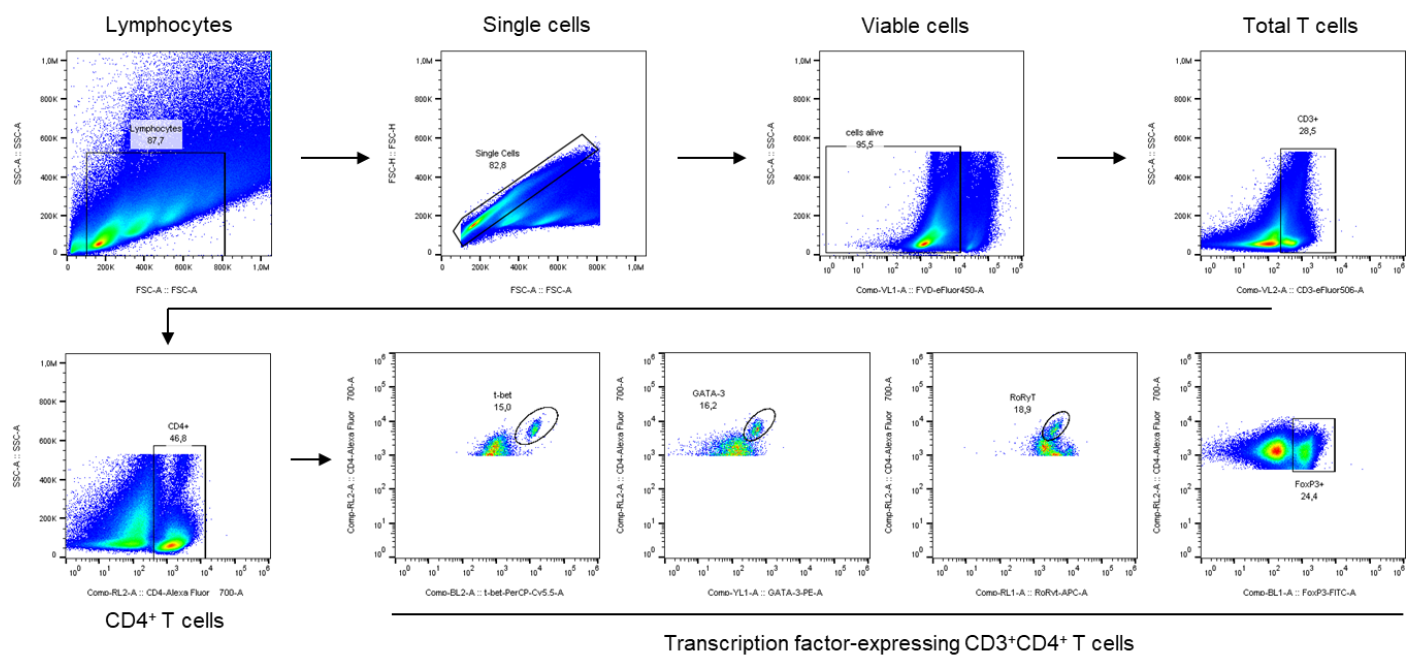

**Figure S8.** Gating strategy for intracellular detection of transcription factors in CD4<sup>+</sup> T cells in spleen, lymph node and spinal cord (FACSymphony).

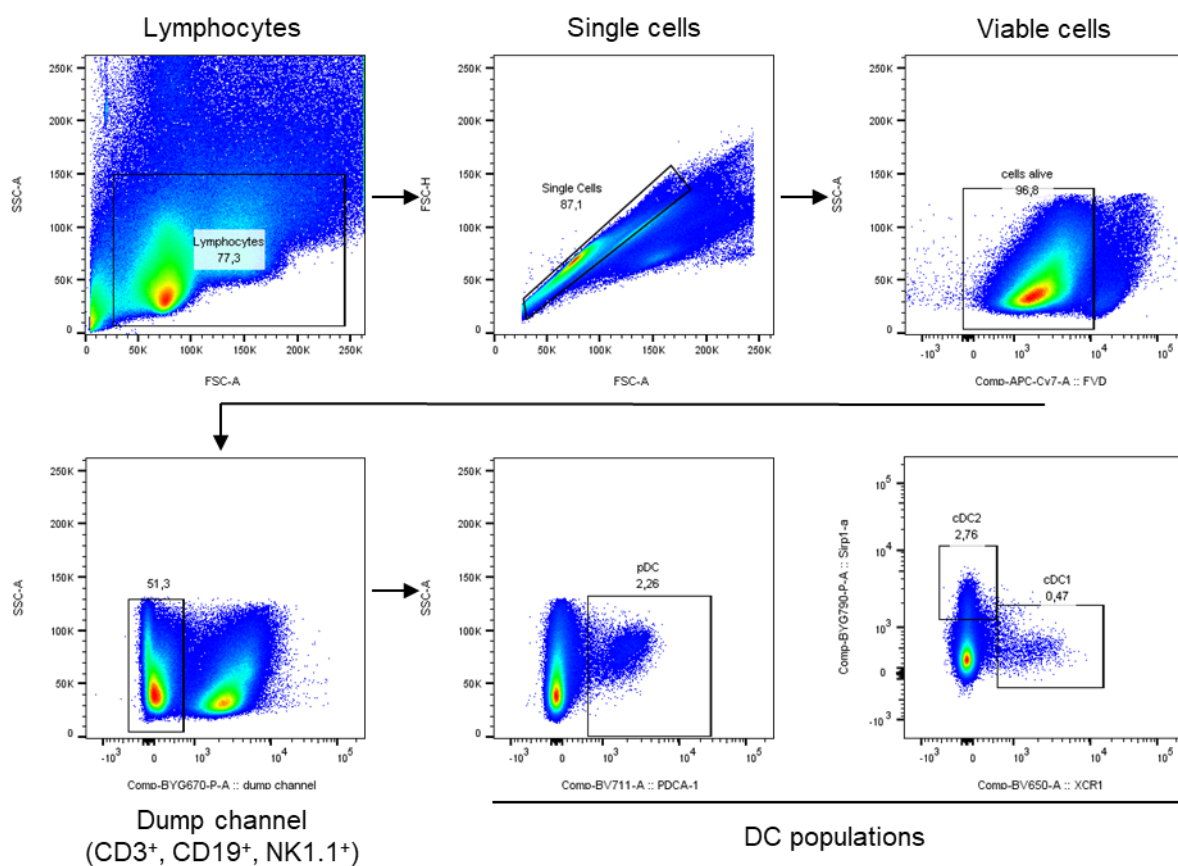

**Figure S9.** Gating strategy for detection of DC populations in spleen, lymph node and spinal cord (FACSymphony).

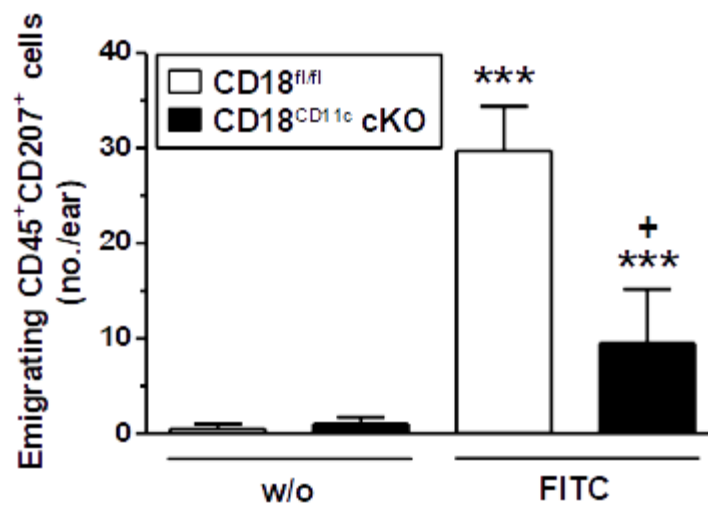

**Figure S10.** CD207<sup>+</sup> DC of CD18<sup>CD11c</sup> cKO mice emigrate at lower extent from ears after FITC application. Mouse ears were split, both halves were placed into 12-well plates (1 ml of IMDM-based culture media) with the outside upwards. Then, 5  $\mu$ l of FITC solution (fluorescein isothiocyanate, 5 mg/ml) dissolved in 1:1 (v/v) acetone:dibutylphalate (all from sigma-Aldrich) were applied to half of all samples. On the next day, frequencies of CD45<sup>+</sup>CD207<sup>+</sup> DC in culture media was assessed by flow cytometry (mean  $\pm$  SEM, n=4). Statistical differences versus \*untreated (w/o) and +CD18<sup>fl/fl</sup> are indicated (one way ANOVA, Tukey test). \*p<0.05, \*\*\*p<0.001.

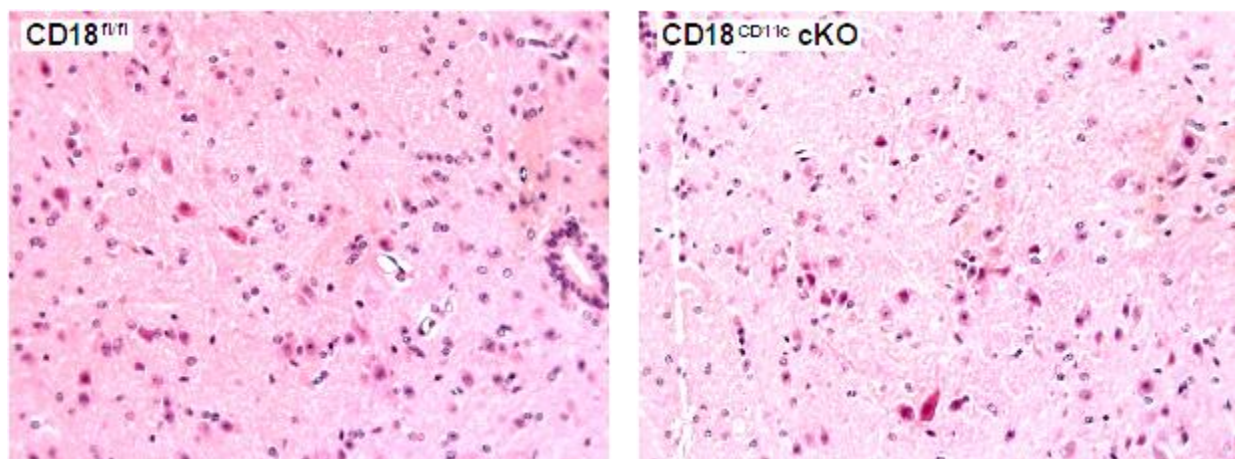

**Figure S11.** Spinal cord of CD18<sup>CD11c</sup> cKO mice displays somewhat lower leukocyte infiltration. Spines were retrieved on d38 after the onset of EAE and stored in 10% paraformaldehyde for histopathological analysis. Paraffin-embedded blocks were prepared, and derived sections (5  $\mu$ m) were stained with hematoxylin and eosin (H&E) to assess infiltration of leukocytes. For this, H&E-stained sections were examined microscopically using a BX40 microscope equipped with a CCD camera (both from Olympus, Hamburg, Germany) for total cells per field of view (CD18<sup>fl/fl</sup>: 338; CD18<sup>CD11c</sup> cKO: 264). Pictures are representative of samples obtained from two animals each.
